# Supplementary material for: Effects of Microcystin-LR on Metabolic Functions and Structure Succession of Sediment Bacterial Community under Anaerobic Conditions
Source: PubMed Central journal article supplement (PMC7150748; doi:10.3390/toxins12030183), 2020-03-15
Supplement: toxins-12-00183-s001.pdf [file toxins-12-00183-s001.pdf]

# Supplementary Materials: Effects of Microcystin-LR on Metabolic Functions and Structure Succession of Sediment Bacterial Community under Anaerobic Conditions

Qin Ding, Kaiyan Liu, Zhiquan Song, Rongli Sun, Juan Zhang, Lihong Yin and Yuepu Pu

**Table S1.** The concentrations of MC-LR for different samples with different incubation time (mg/L).

| Time / h | Control     | G0          | G1          | G2          | G3          |
|----------|-------------|-------------|-------------|-------------|-------------|
| 0        | 1.00 ± 0.03 | 1.00 ± 0.04 | 1.00 ± 0.02 | 1.00 ± 0.03 | 1.00 ± 0.01 |
| 12       | 1.07 ± 0.05 | 0.89 ± 0.05 | 0.79 ± 0.03 | 0.70 ± 0.06 | 0.65 ± 0.03 |
| 24       | 0.99 ± 0.03 | 0.87 ± 0.03 | 0.73 ± 0.03 | 0.58 ± 0.05 | 0.51 ± 0.04 |
| 36       | 1.05 ± 0.04 | 0.85 ± 0.07 | 0.70 ± 0.07 | 0.50 ± 0.04 | 0.37 ± 0.04 |
| 48       | 0.92 ± 0.04 | 0.74 ± 0.05 | 0.57 ± 0.04 | 0.34 ± 0.02 | 0.22 ± 0.04 |
| 60       | 0.94 ± 0.04 | 0.74 ± 0.04 | 0.42 ± 0.06 | 0.27 ± 0.04 | 0.14 ± 0.03 |
| 72       | 0.86 ± 0.04 | 0.66 ± 0.05 | 0.37 ± 0.04 | 0.15 ± 0.03 | 0.08 ± 0.02 |
| 84       | 0.93 ± 0.07 | 0.54 ± 0.04 | 0.24 ± 0.02 | 0.11 ± 0.03 | 0.04 ± 0.01 |
| 96       | 0.92 ± 0.05 | 0.48 ± 0.04 | 0.19 ± 0.06 | 0.05 ± 0.02 | 0.00 ± 0.00 |
| 108      | 0.97 ± 0.04 | 0.36 ± 0.05 | 0.16 ± 0.05 | 0.00 ± 0.00 | 0.00 ± 0.00 |
| 120      | 0.95 ± 0.05 | 0.26 ± 0.08 | 0.08 ± 0.03 | 0.00 ± 0.00 | 0.00 ± 0.00 |
| 132      | 0.97 ± 0.04 | 0.21 ± 0.04 | 0.03 ± 0.02 | 0.00 ± 0.00 | 0.00 ± 0.00 |
| 144      | 1.01 ± 0.05 | 0.18 ± 0.03 | 0.00 ± 0.00 | 0.00 ± 0.00 | 0.00 ± 0.00 |
| 156      | 0.94 ± 0.05 | 0.16 ± 0.03 | 0.00 ± 0.00 | 0.00 ± 0.00 | 0.00 ± 0.00 |
| 168      | 0.95 ± 0.04 | 0.13 ± 0.03 | 0.00 ± 0.00 | 0.00 ± 0.00 | 0.00 ± 0.00 |

Data are shown as mean values ± standard deviation (SD) ( $n = 3$ ).

**Table S2.** Utilization of various carbon sources by the sediment bacterial communities in different samples after 168 h of incubation.

| Samples | Carbohydrates | Amino Acids  | Polymers    | Phenolic Compounds | Amines      | Carboxylic Acids |
|---------|---------------|--------------|-------------|--------------------|-------------|------------------|
| G0      | 0.71 ± 0.04   | 0.84 ± 0.09  | 1.03 ± 0.10 | 0.47 ± 0.07        | 0.80 ± 0.16 | 0.66 ± 0.09      |
| G1      | 0.67 ± 0.07   | 0.36 ± 0.04* | 0.70 ± 0.01 | 0.28 ± 0.05        | 0.59 ± 0.04 | 0.36 ± 0.05      |
| G2      | 0.37 ± 0.17   | 0.23 ± 0.13* | 0.45 ± 0.22 | 0.19 ± 0.17        | 0.34 ± 0.08 | 0.33 ± 0.06      |
| G3      | 0.18 ± 0.04   | 0.30 ± 0.05* | 0.39 ± 0.09 | 0.08 ± 0.07*       | 0.22 ± 0.02 | 0.32 ± 0.05      |

Data are shown as mean values ± SD ( $n = 3$ ), \*  $p < 0.05$  (sample G0 versus MC-LR treated samples).
